# Supplementary material for: A MULTI-GROUP METHOD FOR COMPUTING CRITICAL MASSES OF INTERMEDIATE PILES
Source: PeerJ journal article supplement (doi:10.7717/peerj.10441), 1947-05-01
Supplement: Supplementary_materials.docx [file Supplementary_materials.docx]

**The list of differentially expressed genes in this study.**

| **Genes** | **FDR** | **Raw_p** | **Regulation** | **Genes** | **FDR** | **Raw_p** | **Regulation** |
| --- | --- | --- | --- | --- | --- | --- | --- |
| MTMR7 | 0.99997183 | 0.000148288 | Up-regulation | DDX21 | 0.99997183 | 0.02523986 | Down-regulation |
| TBCD | 0.99997183 | 0.000938417 | Up-regulation | OLIG3 | 0.99997183 | 0.025316539 | Up-regulation |
| LDHA | 0.99997183 | 0.000999269 | Down-regulation | RFTN2 | 0.99997183 | 0.025381398 | Up-regulation |
| NUDT13 | 0.99997183 | 0.00158555 | Up-regulation | ABCA1 | 0.99997183 | 0.025487634 | Up-regulation |
| CCNT1 | 0.99997183 | 0.001880971 | Up-regulation | C11orf84 | 0.99997183 | 0.025525602 | Down-regulation |
| AQP1 | 0.99997183 | 0.002037548 | Down-regulation | PEG10 | 0.99997183 | 0.025771563 | Up-regulation |
| GALNT12 | 0.99997183 | 0.002040516 | Up-regulation | TM7SF3 | 0.99997183 | 0.02581665 | Up-regulation |
| MBD4 | 0.99997183 | 0.002094848 | Down-regulation | LSM1 | 0.99997183 | 0.026045562 | Down-regulation |
| NSL1 | 0.99997183 | 0.002446052 | Up-regulation | PCDHGB8P | 0.99997183 | 0.026168183 | Up-regulation |
| SERPINB7 | 0.99997183 | 0.002697094 | Up-regulation | CBX8 | 0.99997183 | 0.026403487 | Up-regulation |
| CC2D2A | 0.99997183 | 0.00290537 | Up-regulation | BMX | 0.99997183 | 0.026532771 | Down-regulation |
| DNAJC6 | 0.99997183 | 0.00292075 | Up-regulation | LINC00330 | 0.99997183 | 0.026688056 | Down-regulation |
| WDR3 | 0.99997183 | 0.003291748 | Up-regulation | BTBD16 | 0.99997183 | 0.026732434 | Up-regulation |
| RMND5A | 0.99997183 | 0.003323047 | Up-regulation | DHDH | 0.99997183 | 0.026789724 | Up-regulation |
| ADAMTS19 | 0.99997183 | 0.003574346 | Up-regulation | OR10A4 | 0.99997183 | 0.026872169 | Up-regulation |
| ATRN | 0.99997183 | 0.003822778 | Up-regulation | COL19A1 | 0.99997183 | 0.02713484 | Up-regulation |
| LOC101926918 | 0.99997183 | 0.003860625 | Down-regulation | ALDH1L2 | 0.99997183 | 0.027251665 | Down-regulation |
| DIP2C | 0.99997183 | 0.00396923 | Up-regulation | BAX | 0.99997183 | 0.027623738 | Down-regulation |
| GPX2 | 0.99997183 | 0.004022984 | Down-regulation | RIMS4 | 0.99997183 | 0.028096335 | Up-regulation |
| LOC100505570 | 0.99997183 | 0.004121216 | Up-regulation | NRCAM | 0.99997183 | 0.028144849 | Down-regulation |
| ETV1 | 0.99997183 | 0.004367889 | Down-regulation | LOC283352 | 0.99997183 | 0.02839697 | Down-regulation |
| ERC1 | 0.99997183 | 0.004922453 | Up-regulation | QTRT1 | 0.99997183 | 0.028850583 | Down-regulation |
| SRP54 | 0.99997183 | 0.005096383 | Down-regulation | PRPF40A | 0.99997183 | 0.028863244 | Up-regulation |
| FGF11 | 0.99997183 | 0.005171612 | Down-regulation | EBF3 | 0.99997183 | 0.02891989 | Up-regulation |
| LAMA3 | 0.99997183 | 0.005271344 | Up-regulation | SHMT1 | 0.99997183 | 0.028934914 | Up-regulation |
| FAM214B | 0.99997183 | 0.005452723 | Down-regulation | GATA6 | 0.99997183 | 0.029084602 | Up-regulation |
| DNAJB12 | 0.99997183 | 0.005480132 | Up-regulation | ZNF319 | 0.99997183 | 0.029157412 | Down-regulation |
| CCNC | 0.99997183 | 0.005533545 | Up-regulation | GAS2L3 | 0.99997183 | 0.029215046 | Down-regulation |
| ANKRD22 | 0.99997183 | 0.00575315 | Down-regulation | ZNF844 | 0.99997183 | 0.029350192 | Up-regulation |
| CKMT2 | 0.99997183 | 0.006074322 | Down-regulation | AOC4P | 0.99997183 | 0.029423316 | Down-regulation |
| MC4R | 0.99997183 | 0.00625916 | Down-regulation | LOC340107 | 0.99997183 | 0.029524442 | Down-regulation |
| PPP1R12A | 0.99997183 | 0.006319598 | Up-regulation | PPP1R16A | 0.99997183 | 0.029755297 | Down-regulation |
| NKX6-1 | 0.99997183 | 0.006532913 | Down-regulation | HOGA1 | 0.99997183 | 0.030043038 | Down-regulation |
| LOC101927257 | 0.99997183 | 0.006536517 | Up-regulation | CUX2 | 0.99997183 | 0.030048916 | Up-regulation |
| MRPL47 | 0.99997183 | 0.006591143 | Down-regulation | OTUD1 | 0.99997183 | 0.030133304 | Down-regulation |
| LOC101927438 | 0.99997183 | 0.006649419 | Up-regulation | C9 | 0.99997183 | 0.030232251 | Up-regulation |
| FGFBP3 | 0.99997183 | 0.006837177 | Up-regulation | ZNF148 | 0.99997183 | 0.030327328 | Up-regulation |
| USP47 | 0.99997183 | 0.007006845 | Up-regulation | CKS2 | 0.99997183 | 0.030806185 | Down-regulation |
| WBSCR27 | 0.99997183 | 0.007024074 | Up-regulation | PNPLA1 | 0.99997183 | 0.030844392 | Up-regulation |
| TMEM52 | 0.99997183 | 0.007176363 | Up-regulation | RBBP8 | 0.99997183 | 0.031417122 | Down-regulation |
| TTLL9 | 0.99997183 | 0.007223457 | Down-regulation | FSCN2 | 0.99997183 | 0.031475977 | Up-regulation |
| GSS | 0.99997183 | 0.00763722 | Up-regulation | IL11 | 0.99997183 | 0.031666194 | Up-regulation |
| RNASEH1-AS1 | 0.99997183 | 0.007659592 | Up-regulation | ADIPOR2 | 0.99997183 | 0.031768056 | Down-regulation |
| RIN3 | 0.99997183 | 0.007710167 | Up-regulation | DNAI1 | 0.99997183 | 0.031793578 | Down-regulation |
| FAM230B | 0.99997183 | 0.007726981 | Up-regulation | LRFN1 | 0.99997183 | 0.031814196 | Down-regulation |
| ULK4 | 0.99997183 | 0.007733322 | Up-regulation | MPV17L | 0.99997183 | 0.032120295 | Up-regulation |
| FBXL21 | 0.99997183 | 0.007856696 | Up-regulation | MUC4 | 0.99997183 | 0.032120981 | Down-regulation |
| GARS | 0.99997183 | 0.008130762 | Down-regulation | KCNT2 | 0.99997183 | 0.032252387 | Up-regulation |
| MYO7A | 0.99997183 | 0.008265059 | Down-regulation | ZCCHC12 | 0.99997183 | 0.032371466 | Down-regulation |
| DLK1 | 0.99997183 | 0.008368547 | Up-regulation | FAM19A2 | 0.99997183 | 0.03249733 | Up-regulation |
| SCG5 | 0.99997183 | 0.008412794 | Up-regulation | EHMT1-IT1 | 0.99997183 | 0.032527145 | Up-regulation |
| TAX1BP1 | 0.99997183 | 0.008769525 | Up-regulation | LOC101929486 | 0.99997183 | 0.032564595 | Up-regulation |
| PEX6 | 0.99997183 | 0.008926212 | Up-regulation | FKBP14 | 0.99997183 | 0.032693365 | Down-regulation |
| WNT8B | 0.99997183 | 0.009145076 | Down-regulation | SOSTDC1 | 0.99997183 | 0.032752177 | Down-regulation |
| CUEDC1 | 0.99997183 | 0.009201842 | Down-regulation | CATSPER1 | 0.99997183 | 0.032941609 | Down-regulation |
| SPNS2 | 0.99997183 | 0.009336805 | Down-regulation | STK16 | 0.99997183 | 0.032975619 | Down-regulation |
| SLC7A13 | 0.99997183 | 0.009424344 | Up-regulation | PAX8-AS1 | 0.99997183 | 0.033171187 | Up-regulation |
| HAUS7 | 0.99997183 | 0.010054769 | Down-regulation | CXCL3 | 0.99997183 | 0.03320642 | Down-regulation |
| TUBA1C | 0.99997183 | 0.010165344 | Down-regulation | CBS | 0.99997183 | 0.033283306 | Down-regulation |
| PSMG3-AS1 | 0.99997183 | 0.010477003 | Down-regulation | USP16 | 0.99997183 | 0.033300114 | Up-regulation |
| CCDC58 | 0.99997183 | 0.010514598 | Down-regulation | NRP2 | 0.99997183 | 0.033301398 | Up-regulation |
| CDK10 | 0.99997183 | 0.010521738 | Down-regulation | TSHB | 0.99997183 | 0.033332555 | Up-regulation |
| PMM2 | 0.99997183 | 0.010570415 | Down-regulation | FATE1 | 0.99997183 | 0.033388389 | Down-regulation |
| MPP6 | 0.99997183 | 0.010668104 | Up-regulation | SLC52A1 | 0.99997183 | 0.033462643 | Down-regulation |
| MICALL1 | 0.99997183 | 0.010711954 | Down-regulation | DHH | 0.99997183 | 0.033593822 | Up-regulation |
| RANBP10 | 0.99997183 | 0.011027164 | Up-regulation | AKAP13 | 0.99997183 | 0.033664278 | Up-regulation |
| CXorf40A | 0.99997183 | 0.011754483 | Down-regulation | LOC285889 | 0.99997183 | 0.033746423 | Up-regulation |
| ZBED5-AS1 | 0.99997183 | 0.011898238 | Down-regulation | CD63 | 0.99997183 | 0.033796557 | Down-regulation |
| C7orf33 | 0.99997183 | 0.012111537 | Up-regulation | WISP2 | 0.99997183 | 0.034023154 | Up-regulation |
| VANGL1 | 0.99997183 | 0.012128776 | Up-regulation | CHMP4B | 0.99997183 | 0.034060175 | Up-regulation |
| LOC100506606 | 0.99997183 | 0.012632673 | Down-regulation | PPP1R35 | 0.99997183 | 0.034123345 | Down-regulation |
| CDH8 | 0.99997183 | 0.012683932 | Down-regulation | PYROXD2 | 0.99997183 | 0.03420193 | Down-regulation |
| YEATS4 | 0.99997183 | 0.012692267 | Up-regulation | RRP12 | 0.99997183 | 0.034245233 | Up-regulation |
| LOC101928123 | 0.99997183 | 0.012900561 | Up-regulation | ZC3H15 | 0.99997183 | 0.034287516 | Up-regulation |
| LYRM9 | 0.99997183 | 0.013039089 | Up-regulation | RPL10L | 0.99997183 | 0.034773889 | Down-regulation |
| SBF2-AS1 | 0.99997183 | 0.013182809 | Up-regulation | PTPRJ | 0.99997183 | 0.03480376 | Up-regulation |
| NIPA2 | 0.99997183 | 0.013334042 | Down-regulation | APELA | 0.99997183 | 0.035470803 | Up-regulation |
| ZNF541 | 0.99997183 | 0.013518579 | Down-regulation | RREB1 | 0.99997183 | 0.035573849 | Down-regulation |
| SMIM10 | 0.99997183 | 0.013602971 | Up-regulation | ARID3B | 0.99997183 | 0.035644045 | Down-regulation |
| NTS | 0.99997183 | 0.013660943 | Down-regulation | LRIF1 | 0.99997183 | 0.035647103 | Down-regulation |
| KNCN | 0.99997183 | 0.01367965 | Up-regulation | ASTN1 | 0.99997183 | 0.035653752 | Up-regulation |
| TSPYL1 | 0.99997183 | 0.013857363 | Up-regulation | DNAH5 | 0.99997183 | 0.03576346 | Up-regulation |
| LSM11 | 0.99997183 | 0.014477064 | Up-regulation | NT5C | 0.99997183 | 0.035850482 | Down-regulation |
| RHBDD3 | 0.99997183 | 0.014620654 | Down-regulation | TUBA4B | 0.99997183 | 0.036009426 | Down-regulation |
| LASP1 | 0.99997183 | 0.014719811 | Down-regulation | TAF15 | 0.99997183 | 0.036046154 | Up-regulation |
| LOC401324 | 0.99997183 | 0.01487373 | Down-regulation | HNRNPAB | 0.99997183 | 0.036056033 | Down-regulation |
| EEPD1 | 0.99997183 | 0.014920446 | Up-regulation | NMT2 | 0.99997183 | 0.036287674 | Up-regulation |
| KALRN | 0.99997183 | 0.014937174 | Up-regulation | GPANK1 | 0.99997183 | 0.036379846 | Down-regulation |
| FLJ34503 | 0.99997183 | 0.015158928 | Up-regulation | MRO | 0.99997183 | 0.036509888 | Up-regulation |
| THEM5 | 0.99997183 | 0.015253475 | Up-regulation | MROH8 | 0.99997183 | 0.03659908 | Up-regulation |
| ZNF33A | 0.99997183 | 0.015339333 | Up-regulation | FRMD3 | 0.99997183 | 0.036644074 | Up-regulation |
| LOC101928152 | 0.99997183 | 0.015460094 | Up-regulation | TANGO2 | 0.99997183 | 0.036715216 | Down-regulation |
| EFHC2 | 0.99997183 | 0.015645004 | Up-regulation | MAVS | 0.99997183 | 0.03679225 | Up-regulation |
| ASRGL1 | 0.99997183 | 0.016149748 | Down-regulation | ACTR3BP2 | 0.99997183 | 0.036913073 | Down-regulation |
| PTER | 0.99997183 | 0.016464688 | Up-regulation | ZSCAN29 | 0.99997183 | 0.036978536 | Down-regulation |
| LYPD8 | 0.99997183 | 0.016487279 | Up-regulation | RXFP2 | 0.99997183 | 0.03700164 | Down-regulation |
| IGLL1 | 0.99997183 | 0.016818706 | Up-regulation | FBLN5 | 0.99997183 | 0.037102293 | Up-regulation |
| GCNT4 | 0.99997183 | 0.016863329 | Up-regulation | CBLN1 | 0.99997183 | 0.037142717 | Up-regulation |
| CENPU | 0.99997183 | 0.016900563 | Up-regulation | DBF4 | 0.99997183 | 0.03716267 | Down-regulation |
| PIAS1 | 0.99997183 | 0.016939936 | Up-regulation | AVL9 | 0.99997183 | 0.037187227 | Up-regulation |
| ZFYVE9 | 0.99997183 | 0.017171242 | Up-regulation | CYP4V2 | 0.99997183 | 0.037271451 | Up-regulation |
| GPRC6A | 0.99997183 | 0.017348557 | Down-regulation | FAM198A | 0.99997183 | 0.037308998 | Up-regulation |
| SIPA1 | 0.99997183 | 0.017695494 | Down-regulation | STK19 | 0.99997183 | 0.03731651 | Down-regulation |
| DBI | 0.99997183 | 0.01792988 | Down-regulation | TREH | 0.99997183 | 0.03756834 | Up-regulation |
| HAVCR1P1 | 0.99997183 | 0.018284084 | Up-regulation | ZSWIM5 | 0.99997183 | 0.03781441 | Down-regulation |
| ZSCAN4 | 0.99997183 | 0.0183589 | Down-regulation | ATAD5 | 0.99997183 | 0.038043872 | Up-regulation |
| ACSBG2 | 0.99997183 | 0.018425822 | Down-regulation | FAM47E | 0.99997183 | 0.038138169 | Up-regulation |
| ASB5 | 0.99997183 | 0.018533748 | Up-regulation | TNFRSF1B | 0.99997183 | 0.038410612 | Down-regulation |
| TAS2R4 | 0.99997183 | 0.018540051 | Up-regulation | ASPN | 0.99997183 | 0.038547677 | Up-regulation |
| LTB4R | 0.99997183 | 0.018583203 | Down-regulation | PSMC1 | 0.99997183 | 0.038555384 | Down-regulation |
| RAD23B | 0.99997183 | 0.018681585 | Up-regulation | FAM117B | 0.99997183 | 0.038607369 | Up-regulation |
| CD84 | 0.99997183 | 0.01871542 | Down-regulation | NXNL2 | 0.99997183 | 0.03903726 | Up-regulation |
| WFDC13 | 0.99997183 | 0.018888058 | Up-regulation | FAM213B | 0.99997183 | 0.039104314 | Down-regulation |
| AHSP | 0.99997183 | 0.019156462 | Down-regulation | GARNL3 | 0.99997183 | 0.039200929 | Up-regulation |
| ABCB1 | 0.99997183 | 0.019217014 | Up-regulation | TMEM114 | 0.99997183 | 0.039476611 | Down-regulation |
| PSMA1 | 0.99997183 | 0.019266336 | Down-regulation | GAB4 | 0.99997183 | 0.039836406 | Up-regulation |
| LOC101928273 | 0.99997183 | 0.019280319 | Down-regulation | RAB1A | 0.99997183 | 0.039946459 | Up-regulation |
| FCRL4 | 0.99997183 | 0.019297306 | Down-regulation | SH3KBP1 | 0.99997183 | 0.03995015 | Up-regulation |
| CELA3A | 0.99997183 | 0.019433295 | Down-regulation | TAAR9 | 0.99997183 | 0.040010177 | Down-regulation |
| YIPF1 | 0.99997183 | 0.019446862 | Down-regulation | WDR70 | 0.99997183 | 0.04010483 | Up-regulation |
| C19orf47 | 0.99997183 | 0.019687557 | Up-regulation | APOL6 | 0.99997183 | 0.040210321 | Down-regulation |
| PDLIM2 | 0.99997183 | 0.019913375 | Down-regulation | OR7E47P | 0.99997183 | 0.04021263 | Up-regulation |
| NRBP1 | 0.99997183 | 0.020069262 | Down-regulation | IPO11 | 0.99997183 | 0.040296151 | Up-regulation |
| FOXF1 | 0.99997183 | 0.020141144 | Up-regulation | SH3RF1 | 0.99997183 | 0.040669831 | Down-regulation |
| ZNF876P | 0.99997183 | 0.020365807 | Up-regulation | KIAA1524 | 0.99997183 | 0.041466366 | Up-regulation |
| CYP27A1 | 0.99997183 | 0.020708873 | Down-regulation | SCMH1 | 0.99997183 | 0.041489003 | Down-regulation |
| CCDC87 | 0.99997183 | 0.02081647 | Down-regulation | HSD17B11 | 0.99997183 | 0.041565502 | Up-regulation |
| CLDN18 | 0.99997183 | 0.02095662 | Down-regulation | PNMA6A | 0.99997183 | 0.041964352 | Down-regulation |
| MSN | 0.99997183 | 0.020997058 | Down-regulation | CGA | 0.99997183 | 0.042146565 | Down-regulation |
| ZNF287 | 0.99997183 | 0.021042132 | Up-regulation | NHSL1 | 0.99997183 | 0.042197996 | Down-regulation |
| PBX1 | 0.99997183 | 0.021068682 | Up-regulation | HOXA2 | 0.99997183 | 0.042589008 | Down-regulation |
| ITIH6 | 0.99997183 | 0.021098236 | Down-regulation | TRIM68 | 0.99997183 | 0.042785721 | Down-regulation |
| GPT | 0.99997183 | 0.021164617 | Down-regulation | CALU | 0.99997183 | 0.042831136 | Up-regulation |
| LOC101928211 | 0.99997183 | 0.021209091 | Up-regulation | ALAD | 0.99997183 | 0.04287972 | Down-regulation |
| BCL2 | 0.99997183 | 0.021325816 | Up-regulation | PARP15 | 0.99997183 | 0.042884757 | Up-regulation |
| C3orf33 | 0.99997183 | 0.021334739 | Up-regulation | LOC100506571 | 0.99997183 | 0.043011215 | Down-regulation |
| PALLD | 0.99997183 | 0.021404807 | Up-regulation | HIST1H4D | 0.99997183 | 0.043234567 | Up-regulation |
| SLC6A18 | 0.99997183 | 0.021808451 | Up-regulation | SLC35E3 | 0.99997183 | 0.043384208 | Down-regulation |
| LOC101929584 | 0.99997183 | 0.021845361 | Down-regulation | HPS6 | 0.99997183 | 0.04352261 | Down-regulation |
| ALS2CL | 0.99997183 | 0.02205208 | Down-regulation | TULP1 | 0.99997183 | 0.043794914 | Down-regulation |
| SAYSD1 | 0.99997183 | 0.022179594 | Up-regulation | RAB2A | 0.99997183 | 0.043855297 | Down-regulation |
| THBS1 | 0.99997183 | 0.022503555 | Up-regulation | EIF4A3 | 0.99997183 | 0.044049178 | Down-regulation |
| AHCYL1 | 0.99997183 | 0.022605331 | Down-regulation | ARRB2 | 0.99997183 | 0.044475877 | Up-regulation |
| EBPL | 0.99997183 | 0.022759339 | Down-regulation | SLC25A45 | 0.99997183 | 0.044746148 | Up-regulation |
| MGC27382 | 0.99997183 | 0.022800684 | Up-regulation | C6orf223 | 0.99997183 | 0.044946033 | Down-regulation |
| SULT1A1 | 0.99997183 | 0.022804276 | Down-regulation | NOSTRIN | 0.99997183 | 0.045181933 | Down-regulation |
| ZC3HAV1L | 0.99997183 | 0.022847088 | Up-regulation | SF3B2 | 0.99997183 | 0.045304625 | Up-regulation |
| LOC101928847 | 0.99997183 | 0.022919901 | Up-regulation | ZMYM6 | 0.99997183 | 0.045372627 | Up-regulation |
| GGT6 | 0.99997183 | 0.023372028 | Up-regulation | NDUFV2 | 0.99997183 | 0.045790677 | Down-regulation |
| ZNF93 | 0.99997183 | 0.023384098 | Up-regulation | LEP | 0.99997183 | 0.046006859 | Up-regulation |
| UGT2B4 | 0.99997183 | 0.023723852 | Down-regulation | NOP58 | 0.99997183 | 0.046135472 | Down-regulation |
| GYG1 | 0.99997183 | 0.023730629 | Down-regulation | NAALADL2 | 0.99997183 | 0.046423493 | Up-regulation |
| RBFADN | 0.99997183 | 0.023765261 | Up-regulation | TLDC2 | 0.99997183 | 0.04657707 | Up-regulation |
| GABRB3 | 0.99997183 | 0.023779691 | Up-regulation | PPIA | 0.99997183 | 0.046645347 | Down-regulation |
| HINT3 | 0.99997183 | 0.023851374 | Up-regulation | SDAD1 | 0.99997183 | 0.047685901 | Up-regulation |
| AQP10 | 0.99997183 | 0.023997337 | Up-regulation | WLS | 0.99997183 | 0.047697634 | Up-regulation |
| PPP2CB | 0.99997183 | 0.024125422 | Up-regulation | PABPC1 | 0.99997183 | 0.04775753 | Up-regulation |
| FAAH2 | 0.99997183 | 0.024174325 | Down-regulation | HP | 0.99997183 | 0.048273046 | Down-regulation |
| ATP2C2 | 0.99997183 | 0.024276876 | Down-regulation | NKAPP1 | 0.99997183 | 0.048459839 | Down-regulation |
| AKAP14 | 0.99997183 | 0.024406798 | Up-regulation | HERC2P7 | 0.99997183 | 0.048550739 | Up-regulation |
| ASTE1 | 0.99997183 | 0.024442379 | Down-regulation | STXBP5-AS1 | 0.99997183 | 0.048567981 | Down-regulation |
| FAM71E2 | 0.99997183 | 0.024481911 | Up-regulation | LOC100506125 | 0.99997183 | 0.048883526 | Down-regulation |
| LRRC1 | 0.99997183 | 0.0245013 | Up-regulation | WDFY4 | 0.99997183 | 0.04921606 | Up-regulation |
| NLRP5 | 0.99997183 | 0.024570932 | Down-regulation | TERF1 | 0.99997183 | 0.049489546 | Down-regulation |
| PDK1 | 0.99997183 | 0.024913383 | Up-regulation | GPATCH2 | 0.99997183 | 0.049610086 | Down-regulation |

*FDR* false discovery rate
